# Supplementary material for: Risk factors of adverse birth outcomes among a cohort of pregnant women in Coastal Kenya, 2017–2019
Source: Springer Nature journal article supplement (doi:10.1186/s12884-024-06320-6), 2024-02-12
Supplement: MOESM1 [file 26725732]

## Risk factors of adverse birth outcomes among a cohort of pregnant women in Coastal Kenya, 2017-2019

Harriet Mirieri<sup>1\*</sup>, Ruth Nduati<sup>2</sup>, Jeanette Dawa<sup>1</sup>, Lydia Okutoyi<sup>3</sup>, Eric Osoro<sup>1,4</sup>, Cyrus Mugo<sup>5</sup>, Dalton Wamalwa<sup>2</sup>, Hafsa Jin<sup>6</sup>, Dufton Mwaengo<sup>7</sup>, Nancy Otieno<sup>8</sup>, Doris Marwanga<sup>1</sup>, Mufida Shabibi<sup>9</sup>, Peninah Munyua<sup>10</sup> John Kinuthia<sup>5</sup>, Erin Clancey<sup>4</sup>, Marc-Alain Widdowson<sup>10,12¶</sup>, M. Kariuki Njenga<sup>1,4</sup>, Jennifer R. Verani<sup>10</sup>, Irene Inwani<sup>11</sup>

*Supplementary table 1: Comparison of characteristics of participants who had delivery outcome data and those without delivery outcome data.*

| Characteristic                  | N    | Total<br>n (%) | Delivery outcome                                         |                                                            | OR (95% CI)   | p-value |
|---------------------------------|------|----------------|----------------------------------------------------------|------------------------------------------------------------|---------------|---------|
|                                 |      |                | With<br>delivery<br>outcome<br>data<br>(n=1916)<br>n (%) | Without<br>delivery<br>outcome<br>data<br>(n=396)<br>n (%) |               |         |
| Age, years<br>median (IQR)      |      | 28 (24-32)     | 28(24-33)                                                | 27(23-30)                                                  | 1.1 (1.1-1.2) | <0.001* |
| <b>Health facility<br/>type</b> | 2312 |                |                                                          |                                                            |               |         |
| Public                          |      | 1558 (67.4)    | 1262 (65.9)                                              | 296 (74.8)                                                 | Ref           |         |
| Private                         |      | 754 (32.6)     | 654 (34.1)                                               | 100 (25.3)                                                 | 1.5 (1.2-1.9) | 0.001*  |
| <b>Education</b>                | 2278 |                |                                                          |                                                            |               |         |
| Primary                         |      | 592 (26.0)     | 490 (26.0)                                               | 102 (26.0)                                                 | Ref           |         |
| Secondary                       |      | 1016 (44.6)    | 857 (45.5)                                               | 159 (40.4)                                                 | 1.1(0.8-1.5)  | 0.407   |
| College<br>(Middle level)       |      | 670 (29.4)     | 538 (28.5)                                               | 132 (33.6)                                                 | 0.8(0.6-1.1)  | 0.260   |
| <b>Employment</b>               | 2312 |                |                                                          |                                                            |               |         |
| Employed                        |      | 898(38.9)      | 754(39.4)                                                | 144(36.6)                                                  | 1.2(0.9-1.5)  | 0.161   |
| Self employed                   |      | 339(14.7)      | 285(14.9)                                                | 54(13.6)                                                   | 1.2(0.9-1.7)  | 0.294   |
| Unemployed                      |      | 1074(46.5)     | 876(45.7)                                                | 198(50.0)                                                  | Ref           |         |
| <b>Marital status</b>           | 2312 |                |                                                          |                                                            |               |         |
| Married                         |      | 2040 (88.2)    | 1699 (88.7)                                              | 341 (86.1)                                                 | 1.3(0.9-1.7)  | 0.150   |
| Single                          |      | 272 (11.8)     | 217 (11.3)                                               | 55 (13.4)                                                  | Ref           |         |
| <b>Chronic illness</b>          | 2312 |                |                                                          |                                                            |               |         |
| Asthma                          |      | 83 (3.6)       | 68 (3.6)                                                 | 15 (3.8)                                                   | 1.1(0.6-1.9)  | 0.806   |
| Diabetes                        |      | 16 (0.7)       | 13 (0.7)                                                 | 3 (0.7)                                                    | 1.1(0.3-3.9)  | 0.865   |

|                             |      |             |             |            |               |        |
|-----------------------------|------|-------------|-------------|------------|---------------|--------|
| Epilepsy                    |      | 7 (0.3)     | 6 (0.3)     | 1 (0.3)    | 1.2(0.1-10.4) | 0.840  |
| Hypertension                |      | 44 (1.9)    | 36 (1.9)    | 8 (2.0)    | 0.9(0.4-2.0)  | 0.852  |
| <b>Lifestyle factors</b>    | 2312 |             |             |            |               |        |
| Substance use               |      | 87(3.8)     | 75(3.9)     | 12(3.0)    | 1.3(0.7-2.4)  | 0.401  |
| <b>HIV status</b>           | 2160 |             |             |            |               |        |
| HIV positive                |      | 343 (15.9)  | 308 (17.2)  | 35 (9.9)   | 1.9(1.3-2.7)  | 0.001* |
| On HAART                    | 336  | 310(92.3)   | 278(91.8)   | 32(97.0)   | 0.3(0.04-2.6) | 0.308  |
| <b>Syphilis status</b>      | 2072 |             |             |            |               |        |
| Positive                    |      | 29(1.4)     | 26(1.5)     | 3(0.9)     | 1.7(0.5-5.8)  | 0.368  |
| <b>Obstetric factors</b>    |      |             |             |            |               |        |
| Multiparity                 | 2310 | 1620 (70.1) | 1367 (71.4) | 253 (63.9) | 1.4(1.1-1.7)  | 0.003* |
| History of preeclampsia     | 1613 | 1613        | 94(6.9)     | 16(6.3)    | 1.1(0.6-1.9)  | 0.734  |
| History of premature birth  | 1611 | 96(5.9)     | 75(5.5)     | 21(8.3)    | 0.6(0.4-1.1)  | 0.089  |
| History of low birth weight | 1610 | 120(7.5)    | 101(7.4)    | 19(7.6)    | 0.9(0.6-1.6)  | 0.908  |
| <b>County of residence</b>  | 2312 |             |             |            |               |        |
| Within Mombasa County       |      | 2237(96.7)  | 1858(96.9)  | 379(95.7)  | 1.4 (0.8-2.5) | 0.198  |
| Outside Mombasa County      |      | 75(3.1)     | 58(3.1)     | 17(4.3)    | Ref           |        |

\*Variables significant at p value  $\leq 0.05$

Abbreviations: Human immunodeficiency virus (HIV), odds ratio (OR), interquartile range (IQR), antiretroviral therapy (HAART)
